# Supplementary material
Source: publisher site journal article supplement (https://www.degruyterbrill.com/publication/isbn/9783486850581/downloadAsset/9783486850581_Buchinformation.pdf)
Supplement: Supplementary file 1 [file 9783486850581_Buchinformation.pdf]

## Lineare Optimierung und ihre Anwendungen

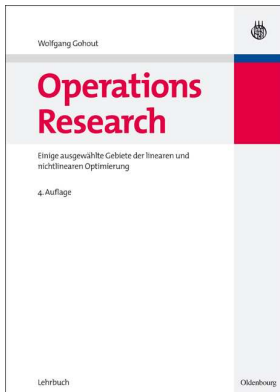

Wolfgang Gohout

### Operations Research

**Einige ausgewählte Gebiete der linearen und nichtlinearen Optimierung**

4., wesentlich erweiterte Auflage 2009  
351 Seiten I Broschur I ca. 34,80 € I ISBN 978-3-486-59034-0

Der Einsatz von Operations Research ist in Unternehmens- und Verwaltungsbereichen weit verbreitet. Dieses einführende und bewährte Lehrbuch beschränkt sich bewusst auf die lineare Optimierung und ihre Anwendungen. Nach einer Einordnung und Entwicklung des Operations Research in einem einführenden Kapitel werden das Grundmodell der linearen Optimierung sowie die graphische Lösung eines LP-Problems vorgestellt.

Darüber hinaus werden die Themengebiete Simplex-Algorithmus, Sonderfälle des Simplex-Algorithmus, Dualität, Postoptimale Rechnungen, Algebraische Sensitivitätsanalyse sowie Transportprobleme behandelt. Abschließend zeigt der Autor Lösungen der Übungsaufgaben auf.

Aus dem Inhalt:

Einordnung und Entwicklung des Operations Research. Grundmodell der linearen Optimierung. Graphische Lösung eines LP-Problems. Simplex-Algorithmus. Sonderfälle des Simplex-Algorithmus. Dualität. Postoptimale Rechnungen. Algebraische Sensitivitätsanalyse. Transportprobleme. Lösungen der Übungsaufgaben.

---

Das Buch eignet sich für Studierende der Wirtschaftswissenschaft sowie technischer Disziplinen.

---

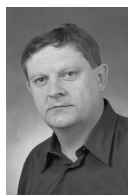

Prof. Dr. Dr. Wolfgang Gohout lehrt Quantitative Methoden an der Fachhochschule in Pforzheim.

[www.oldenbourg.de](http://www.oldenbourg.de)

**Pressereferat Wirtschafts- und Sozialwissenschaften**

Oldenbourg Wissenschaftsverlag I Rosenheimer Str. 145 I 81671 München  
Tel.: +49 89 45051-468 I Fax: +49 89 45051-292 I [presse-wiso@oldenbourg.de](mailto:presse-wiso@oldenbourg.de)

Alle Veröffentlichungen des Oldenbourg Verlags sind über den Buchhandel zu beziehen.

Rezensionsexemplare auf Anforderung.
